# Supplementary material for: Transdiagnostic or Disorder Specific? Indicators of Substance and Behavioral Addictions Nominated by People with Lived Experience
Source: PubMed Central journal article supplement (PMC7073953; doi:10.3390/jcm9020334), 2020-01-24
Supplement: jcm-09-00334-s001.pdf [file jcm-09-00334-s001.pdf]

## Supplemental Tables

*Table S1.* Gender differences in symptoms in first hand **alcohol** respondents

|                           | Males ( <i>n</i> =301) |      | Females ( <i>n</i> =247) |      | $\chi^2$ | <i>p</i> |
|---------------------------|------------------------|------|--------------------------|------|----------|----------|
|                           | N                      | %    | N                        | %    |          |          |
| Behavioral Signs          | 34                     | 11.3 | 24                       | 9.7  | 0.36     | 0.550    |
| Deception                 | 20                     | 6.6  | 27                       | 10.9 | 3.18     | 0.075    |
| Dependence                | 155                    | 51.5 | 144                      | 58.3 | 2.53     | 0.111    |
| Financial Harms           | 11                     | 3.7  | 7                        | 2.8  | 0.29     | 0.592    |
| Health Harms              | 5                      | 1.7  | 5                        | 2.0  | 0.10     | 0.752    |
| Interferes with Life      | 38                     | 12.6 | 34                       | 13.8 | 0.16     | 0.694    |
| Interpersonal Harms       | 19                     | 6.3  | 26                       | 10.5 | 3.20     | 0.074    |
| Narrowing of Repertoire   | 6                      | 2.0  | 7                        | 2.8  | 0.41     | 0.520    |
| Patterns of Use           | 127                    | 42.2 | 119                      | 48.2 | 1.97     | 0.161    |
| Physical Signs            | 36                     | 12.0 | 19                       | 7.7  | 2.74     | 0.098    |
| Psychological Harms       | 46                     | 15.3 | 33                       | 13.4 | 0.41     | 0.524    |
| Rationalization           | 13                     | 4.3  | 18                       | 7.3  | 2.24     | 0.134    |
| Workplace or School Harms | 23                     | 7.6  | 23                       | 9.3  | 0.49     | 0.483    |

**Table S2.** Gender differences in symptoms in first hand **cocaine** respondents

|                           | Males ( <i>n</i> =50) |      | Females ( <i>n</i> =47) |      | $\chi^2$ | <i>p</i> |
|---------------------------|-----------------------|------|-------------------------|------|----------|----------|
|                           | N                     | %    | N                       | %    |          |          |
| Behavioral Signs          | 9                     | 18.0 | 13                      | 27.7 | 1.29     | 0.256    |
| Deception                 | 5                     | 10.0 | 2                       | 4.3  | Fisher's | 0.437*   |
| Dependence                | 21                    | 42.0 | 24                      | 51.1 | 0.80     | 0.371    |
| Financial Harms           | 12                    | 24.0 | 13                      | 27.7 | 0.17     | 0.680    |
| Health Harms              | 2                     | 4.0  | 0                       | 0.0  | Fisher's | 0.495*   |
| Interferes with Life      | 3                     | 6.0  | 7                       | 14.9 | Fisher's | 0.191*   |
| Interpersonal Harms       | 6                     | 12.0 | 6                       | 12.8 | 0.013    | 0.909    |
| Narrowing of Repertoire   | 2                     | 4.0  | 1                       | 2.1  | Fisher's | 1.000*   |
| Patterns of Use           | 10                    | 20.0 | 10                      | 21.3 | 0.02     | 0.877    |
| Physical Signs            | 5                     | 10.0 | 11                      | 23.4 | 3.16     | 0.075    |
| Psychological Harms       | 15                    | 30.0 | 8                       | 17.0 | 2.26     | 0.133    |
| Rationalization           | 2                     | 4.0  | 0                       | 0.0  | Fisher's | 0.495*   |
| Workplace or School Harms | 1                     | 2.0  | 3                       | 6.4  | Fisher's | 0.352*   |

\*Fisher's Exact test was used as expected cell counts were less than 5.

**Table S3.** Gender differences in symptoms in first hand **tobacco** respondents

|                           | Males (n=537) |      | Females (n=708) |      | $\chi^2$ | p                  |
|---------------------------|---------------|------|-----------------|------|----------|--------------------|
|                           | N             | %    | N               | %    |          |                    |
| Behavioral Signs          | 16            | 3.0  | 13              | 1.8  | 1.76     | 0.185              |
| Deception                 | 7             | 1.3  | 8               | 1.1  | 0.08     | 0.781              |
| Dependence                | 322           | 60.0 | 526             | 74.3 | 28.88    | <b>&lt;0.001**</b> |
| Financial Harms           | 33            | 6.1  | 47              | 6.6  | 0.12     | 0.725              |
| Health Harms              | 93            | 17.3 | 85              | 12.0 | 7.04     | <b>0.008*</b>      |
| Interferes with Life      | 34            | 6.3  | 43              | 6.1  | 0.04     | 0.852              |
| Interpersonal Harms       | 2             | 0.4  | 8               | 1.1  | Fisher's | 0.202              |
| Narrowing of Repertoire   | 5             | 0.9  | 17              | 2.4  | 3.80     | 0.051              |
| Patterns of Use           | 239           | 44.5 | 271             | 38.3 | 4.90     | <b>0.027*</b>      |
| Physical Signs            | 53            | 9.9  | 39              | 5.5  | 8.49     | <b>0.004*</b>      |
| Psychological Harms       | 29            | 5.4  | 56              | 7.9  | 3.02     | 0.082              |
| Rationalization           | 10            | 1.9  | 9               | 1.3  | 0.71     | 0.400              |
| Workplace or School Harms | 9             | 1.7  | 1               | 0.1  | Fisher's | <b>0.003*</b>      |

\* Fisher's Exact test was used as expected cell counts were less than 5.  
Bold denotes significant differences

**Table S4.** Gender differences in symptoms in first hand **cannabis** respondents

|                           | Males ( <i>n</i> =93) |      | Females ( <i>n</i> =111) |      | $\chi^2$ | <i>p</i>     |
|---------------------------|-----------------------|------|--------------------------|------|----------|--------------|
|                           | N                     | %    | N                        | %    |          |              |
| Behavioral Signs          | 8                     | 8.6  | 10                       | 9.0  | 0.01     | 0.919        |
| Deception                 | 3                     | 3.2  | 3                        | 2.7  | Fisher's | 1.000*       |
| Dependence                | 44                    | 47.3 | 64                       | 57.7 | 2.17     | 0.140        |
| Financial Harms           | 8                     | 8.6  | 18                       | 16.2 | 2.64     | 0.104        |
| Health Harms              | 2                     | 2.2  | 1                        | 0.9  | Fisher's | 0.593*       |
| Interferes with Life      | 9                     | 9.7  | 6                        | 5.4  | 1.36     | 0.244        |
| Interpersonal Harms       | 9                     | 9.7  | 8                        | 7.2  | 0.40     | 0.525        |
| Narrowing of Repertoire   | 1                     | 1.1  | 2                        | 1.8  | Fisher's | 1.000*       |
| Patterns of Use           | 32                    | 34.4 | 46                       | 41.4 | 1.06     | 0.303        |
| Physical Signs            | 10                    | 10.8 | 12                       | 10.8 | 0.00     | 0.989        |
| Psychological Harms       | 10                    | 10.8 | 30                       | 27.0 | 8.50     | <b>0.004</b> |
| Rationalization           | 2                     | 2.2  | 3                        | 2.7  | Fisher's | 1.000*       |
| Workplace or School Harms | 5                     | 5.4  | 4                        | 3.6  | Fisher's | 0.735*       |

\*Fisher's Exact test was used as expected cell counts were less than 5.

Bold denotes significant differences

**Table S5.** Gender differences in symptoms in first hand **gambling** respondents

|                           | Males ( <i>n</i> =120) |      | Females ( <i>n</i> =82) |      | $\chi^2$ | <i>p</i>     |
|---------------------------|------------------------|------|-------------------------|------|----------|--------------|
|                           | N                      | %    | N                       | %    |          |              |
| Behavioral Signs          | 9                      | 7.5  | 8                       | 9.8  | 0.32     | 0.571        |
| Deception                 | 14                     | 11.7 | 17                      | 20.7 | 3.08     | 0.079        |
| Dependence                | 45                     | 37.5 | 37                      | 45.1 | 1.17     | 0.279        |
| Financial Harms           | 60                     | 50.0 | 56                      | 68.3 | 6.67     | <b>0.010</b> |
| Health Harms              | 0.0                    | 0.0  | 0.0                     | 0.0  | -        | -            |
| Interferes with Life      | 5                      | 4.2  | 1                       | 1.2  | Fisher's | 0.404*       |
| Interpersonal Harms       | 5                      | 4.2  | 7                       | 8.5  | Fisher's | 0.233*       |
| Narrowing of Repertoire   | 3                      | 2.5  | 2                       | 2.4  | Fisher's | 1.000*       |
| Patterns of Use           | 32                     | 26.7 | 21                      | 25.6 | 0.03     | 0.867        |
| Physical Signs            | 0                      | 0.0  | 1                       | 1.2  | Fisher's | 0.406*       |
| Psychological Harms       | 15                     | 12.5 | 11                      | 13.4 | 0.04     | 0.849        |
| Rationalization           | 2                      | 1.7  | 1                       | 1.2  | Fisher's | 1.000*       |
| Workplace or School Harms | 1                      | 0.8  | 3                       | 3.7  | Fisher's | 0.306*       |

\*Fisher's Exact test was used as expected cell counts were less than 5.

Bold denotes significant differences

**Table S6.** Gender differences in symptoms in first hand **shopping** respondents

|                           | Males ( <i>n</i> =71) |      | Females ( <i>n</i> =195) |      | $\chi^2$ | <i>p</i> |
|---------------------------|-----------------------|------|--------------------------|------|----------|----------|
|                           | N                     | %    | N                        | %    |          |          |
| Behavioral Signs          | 1                     | 1.4  | 4                        | 2.1  | Fisher's | 1.000*   |
| Deception                 | 2                     | 2.8  | 12                       | 6.2  | Fisher's | 0.366*   |
| Dependence                | 22                    | 31.0 | 78                       | 40.0 | 1.80     | 0.179    |
| Financial Harms           | 44                    | 62.0 | 123                      | 63.1 | 0.03     | 0.869    |
| Health Harms              | 0                     | 0.0  | 0                        | 0.0  | -        | -        |
| Interferes with Life      | 0                     | 0.0  | 8                        | 4.1  | Fisher's | 0.114*   |
| Interpersonal Harms       | 0                     | 0.0  | 4                        | 2.1  | Fisher's | 0.576*   |
| Narrowing of Repertoire   | 0                     | 0.0  | 2                        | 1.0  | Fisher's | 1.000*   |
| Patterns of Use           | 31                    | 43.7 | 98                       | 50.3 | 0.91     | 0.341    |
| Physical Signs            | 0                     | 0.0  | 0                        | 0.0  | -        | -        |
| Psychological Harms       | 6                     | 8.5  | 18                       | 9.2  | 0.04     | 0.844    |
| Rationalization           | 2                     | 2.8  | 6                        | 3.1  | 0.01     | 0.913    |
| Workplace or School Harms | 0                     | 0.0  | 1                        | 0.5  | Fisher's | 1.000*   |

\*Fisher's Exact test was used as expected cell counts were less than 5.

**Table S7.** Gender differences in symptoms in first hand **sex** respondents

|                           | <b>Males (n=223)</b> |          | <b>Females (n=88)</b> |          | $\chi^2$ | <i>p</i>      |
|---------------------------|----------------------|----------|-----------------------|----------|----------|---------------|
|                           | <b>N</b>             | <b>%</b> | <b>N</b>              | <b>%</b> |          |               |
| Behavioral Signs          | 115                  | 51.6     | 47                    | 53.4     | 0.09     | 0.770         |
| Deception                 | 16                   | 7.2      | 1                     | 1.1      | 4.45     | <b>0.035</b>  |
| Dependence                | 114                  | 51.1     | 38                    | 43.2     | 1.59     | 0.207         |
| Financial Harms           | 5                    | 2.2      | 1                     | 1.1      | Fisher's | 1.000*        |
| Health Harms              | 3                    | 1.3      | 3                     | 3.4      | Fisher's | 0.356*        |
| Interferes with Life      | 16                   | 7.2      | 6                     | 6.8      | 0.01     | 0.912         |
| Interpersonal Harms       | 52                   | 23.3     | 17                    | 19.3     | 0.59     | 0.444         |
| Narrowing of Repertoire   | 8                    | 3.6      | 3                     | 3.4      | Fisher's | 1.000*        |
| Patterns of Use           | 42                   | 18.8     | 16                    | 18.2     | 0.02     | 0.894         |
| Physical Signs            | 6                    | 2.7      | 5                     | 5.7      | Fisher's | 0.303*        |
| Psychological Harms       | 22                   | 9.9      | 16                    | 18.2     | 4.07     | <b>0.044*</b> |
| Rationalization           | 5                    | 2.2      | 1                     | 1.1      | Fisher's | 1.000         |
| Workplace or School Harms | 5                    | 2.2      | 3                     | 3.4      | Fisher's | 0.692*        |

\*Fisher's Exact test was used as expected cell counts were less than 5.

Bold denotes significant differences.

**Table S8.** Gender differences in symptoms in first hand **work** respondents

|                           | <b>Males (n=435)</b> |          | <b>Females (n=444)</b> |          | $\chi^2$ | <i>P</i>         |
|---------------------------|----------------------|----------|------------------------|----------|----------|------------------|
|                           | <b>N</b>             | <b>%</b> | <b>N</b>               | <b>%</b> |          |                  |
| Behavioral Signs          | 27                   | 6.2      | 42                     | 9.5      | 3.21     | 0.073            |
| Deception                 | 1                    | 0.2      | 1                      | 0.2      | 0.00     | 0.988            |
| Dependence                | 159                  | 36.6     | 180                    | 40.5     | 1.48     | 0.224            |
| Financial Harms           | 5                    | 1.1      | 1                      | 0.2      | Fisher's | 0.120*           |
| Health Harms              | 15                   | 3.4      | 22                     | 5.0      | 1.24     | 0.266            |
| Interferes with Life      | 51                   | 11.7     | 67                     | 15.1     | 2.14     | 0.143            |
| Interpersonal Harms       | 78                   | 17.9     | 74                     | 16.7     | 0.25     | 0.620            |
| Narrowing of Repertoire   | 39                   | 9.0      | 58                     | 13.1     | 3.76     | 0.053            |
| Patterns of Use           | 144                  | 33.1     | 155                    | 34.9     | 0.319    | 0.572            |
| Physical Signs            | 0                    | 0.0      | 0                      | 0.0      | -        | -                |
| Psychological Harms       | 139                  | 32.0     | 196                    | 44.1     | 13.84    | <b>&lt;0.001</b> |
| Rationalization           | 3                    | 0.7      | 2                      | 0.5      | Fisher's | 0.684*           |
| Workplace or School Harms | 0                    | 0.0      | 0                      | 0.0      | -        | -                |

\*Fisher's Exact test was used as expected cell counts were less than 5.

**Bold** denotes significant differences



**Table S9.** Gender differences in symptoms in first hand **video game** respondents

|                           | <b>Males (n=118)</b> |          | <b>Females (n=73)</b> |          | $\chi^2$ | <i>P</i> |
|---------------------------|----------------------|----------|-----------------------|----------|----------|----------|
|                           | <b>N</b>             | <b>%</b> | <b>N</b>              | <b>%</b> |          |          |
| Behavioral Signs          | 6                    | 5.1      | 3                     | 4.1      | Fisher's | 1.000*   |
| Deception                 | 2                    | 1.7      | 1                     | 1.4      | Fisher's | 1.000*   |
| Dependence                | 53                   | 44.9     | 41                    | 56.2     | 2.28     | 0.131    |
| Financial Harms           | 7                    | 5.9      | 3                     | 4.1      | Fisher's | 0.744*   |
| Health Harms              | 0                    | 0.0      | 1                     | 1.4      | Fisher's | 0.382*   |
| Interferes with Life      | 28                   | 23.7     | 17                    | 23.3     | 0.01     | 0.944    |
| Interpersonal Harms       | 31                   | 26.3     | 16                    | 21.9     | 0.461    | 0.497    |
| Narrowing of Repertoire   | 12                   | 10.2     | 13                    | 17.8     | Fisher's | 0.184*   |
| Patterns of Use           | 42                   | 35.6     | 24                    | 32.9     | 0.15     | 0.701    |
| Physical Signs            | 18                   | 15.3     | 13                    | 17.8     | 0.22     | 0.642    |
| Psychological Harms       | 12                   | 10.2     | 13                    | 17.8     | 2.31     | 0.128    |
| Rationalization           | 0                    | 0.0      | 1                     | 1.4      | Fisher's | 0.382*   |
| Workplace or School Harms | 9                    | 7.6      | 5                     | 6.8      | 0.04     | 0.841    |

\*Fisher's Exact test was used as expected cell counts were less than 5.

**Table S10.** Gender differences in symptoms in first hand **eating** respondents

|                           | Males ( <i>n</i> =282) |      | Females ( <i>n</i> =753) |      | $\chi^2$ | <i>p</i>         |
|---------------------------|------------------------|------|--------------------------|------|----------|------------------|
|                           | N                      | %    | N                        | %    |          |                  |
| Behavioral Signs          | 15                     | 5.3  | 47                       | 6.2  | 0.31     | 0.578            |
| Deception                 | 18                     | 6.4  | 91                       | 12.1 | 7.08     | <b>0.008</b>     |
| Dependence                | 79                     | 28.0 | 283                      | 37.6 | 8.26     | <b>0.004</b>     |
| Financial Harms           | 2                      | 0.7  | 4                        | 0.5  | Fisher's | 0.666*           |
| Health Harms              | 24                     | 8.5  | 53                       | 7.1  | 0.65     | 0.422            |
| Interferes with Life      | 5                      | 1.8  | 23                       | 3.1  | 1.28     | 0.258            |
| Interpersonal Harms       | 0                      | 0.0  | 18                       | 2.4  | Fisher's | <b>0.006*</b>    |
| Narrowing of Repertoire   | 5                      | 1.8  | 12                       | 1.6  | Fisher's | 0.789*           |
| Patterns of Use           | 117                    | 41.5 | 300                      | 39.8 | 0.232    | 0.630            |
| Physical Signs            | 180                    | 63.8 | 376                      | 49.9 | 15.94    | <b>&lt;0.001</b> |
| Psychological Harms       | 13                     | 4.6  | 61                       | 8.1  | 3.77     | 0.052            |
| Rationalization           | 9                      | 3.2  | 30                       | 4.0  | 0.36     | 0.551            |
| Workplace or School Harms | 1                      | 0.4  | 1                        | 0.1  | Fisher's | 0.471*           |

\*Fisher's Exact test was used as expected cell counts were less than 5.

Bold denotes significant differences.
